# Supplementary material for: Transcriptome Profiling of Placenta through Pregnancy Reveals Dysregulation of Bile Acids Transport and Detoxification Function
Source: MDPI journal article supplement (doi:10.3390/ijms20174099), 2019-08-22
Supplement: s1 [file s1]

**Table S8. The number of fetuses at G60, G90 and L0**

| Item             | G60   | G90   | L0    |
|------------------|-------|-------|-------|
| Litter size      | 13.67 | 12.67 | 11.25 |
| Live litter size | 13.67 | 12.67 | 9.75  |

**Table S9. Primer sets for real-time RT-PCR analysis**

| Gene            | Forward (5'-3')       | Reverse (5'-3')        | Accession number |
|-----------------|-----------------------|------------------------|------------------|
| $\beta$ -actin  | AGAGCAAGAGAGGCATCCTG  | CACGCAGCTCGTTGTAGAAG   | XM_003124280.5   |
| BSEP/ABCB11     | GCCTGACCACGAGCATCT    | AGGTCAGTTTCCAACCCTGAT  | XM_003133457.5   |
| SULT2A1         | CCATGCGAGACAAGGAGAAC  | CATGACCTGGAAGGAGCTGT   | NM_001037150.1   |
| C5aR1           | TGGACTATGGTCGAGACGGT  | ACAGATGGAGAGGGTGACCA   | NM_001244215.1   |
| C3              | AGGCATCGTATCCTCTGGGA  | ACATGGTCACCACCGACAAG   | NM_214009.1      |
| C5              | ACTTGGTGACCTTCGACGTG  | ACCCCTTGGGTCCAGAGTAA   | NM_001001646.1   |
| CA2             | CTTTGACCCTCGTGACCTCC  | CCATCGGGTGTTTCAGGTTCA  | XM_001927805.2   |
| OATP1A2/SLC01A2 | TGACACTGGATCGGTGAACA  | AGGAATGGCAGTGAGCACAT   | NM_001256595.1   |
| XLOC_1286068    | AGCATCTGACTGAAGGACCAG | AGGGTCAGACTCAACATTTCCA |                  |
| XLOC_484235     | CAGCCACCATCCACACTGAC  | GCCAGGCAAGGACTTGTACG   |                  |
| XLOC_1933810    | TAGCCCATCTGCTACCCAGC  | AGCATGGCCAACAGTAACCAA  |                  |
