# Supplementary material for: Transcriptome Profiling of Placenta through Pregnancy Reveals Dysregulation of Bile Acids Transport and Detoxification Function
Source: MDPI journal article supplement (doi:10.3390/ijms20174099), 2019-08-22
Supplement: s1 [file s1]

**Table S1. Quality control and alignment statistics of RNA-seq reads to sus scrofa genome**

| Sample ID        | G60_1                | G60_2                | G60_3                | G90_1                | G90_2                | G90_3                | L0_1                 | L0_2                 | L0_3                 | L0_4                 |
|------------------|----------------------|----------------------|----------------------|----------------------|----------------------|----------------------|----------------------|----------------------|----------------------|----------------------|
| Raw reads        | 91320404             | 1.09E+08             | 1.1E+08              | 1.25E+08             | 1E+08                | 1.1E+08              | 1.09E+08             | 1.19E+08             | 1.07E+08             | 1.19E+08             |
| Clean reads      | 87508166             | 1.05E+08             | 1.05E+08             | 1.2E+08              | 96208856             | 1.05E+08             | 1.06E+08             | 1.16E+08             | 1.05E+08             | 1.15E+08             |
| Total mapped     | 69003108<br>(78.85%) | 83894900<br>(79.78%) | 83109017<br>(79%)    | 97025366<br>(80.78%) | 76484130<br>(79.5%)  | 84176986<br>(80.22%) | 83243390<br>(78.34%) | 90397034<br>(77.74%) | 82724715<br>(79.09%) | 88074917<br>(76.48%) |
| Multiple mapped  | 11076425<br>(12.66%) | 13452462<br>(12.79%) | 14799743<br>(14.07%) | 13623914<br>(11.34%) | 18444907<br>(19.17%) | 12458069<br>(11.87%) | 10671131<br>(10.04%) | 9019371<br>(7.76%)   | 8779608<br>(8.39%)   | 13860220<br>(12.03%) |
| Uniquely mapped  | 57926683<br>(66.2%)  | 70442438<br>(66.99%) | 68309274<br>(64.93%) | 83401452<br>(69.44%) | 58039223<br>(60.33%) | 71718917<br>(68.35%) | 72572259<br>(68.3%)  | 81377663<br>(69.99%) | 73945107<br>(70.7%)  | 74214697<br>(64.44%) |
| Reads map to '+' | 28778127<br>(32.89%) | 35007414<br>(33.29%) | 33931403<br>(32.25%) | 41523765<br>(34.57%) | 28821620<br>(29.96%) | 35632932<br>(33.96%) | 35862630<br>(33.75%) | 40053938<br>(34.45%) | 36797288<br>(35.18%) | 36478109<br>(31.67%) |
| Reads map to '-' | 29148556<br>(33.31%) | 35435024<br>(33.7%)  | 34377871<br>(32.68%) | 41877687<br>(34.87%) | 29217603<br>(30.37%) | 36085985<br>(34.39%) | 36709629<br>(34.55%) | 41323725<br>(35.54%) | 37147819<br>(35.52%) | 37736588<br>(32.77%) |
| Non-splice reads | 39765473<br>(45.44%) | 47794218<br>(45.45%) | 44987126<br>(42.76%) | 59176485<br>(49.27%) | 43825497<br>(45.55%) | 51121867<br>(48.72%) | 56268743<br>(52.95%) | 64024867<br>(55.06%) | 55965146<br>(53.51%) | 55289997<br>(48.01%) |
| Splice reads     | 18161210<br>(20.75%) | 22648220<br>(21.54%) | 23322148<br>(22.17%) | 24224967<br>(20.17%) | 14213726<br>(14.77%) | 20597050<br>(19.63%) | 16303516<br>(15.34%) | 17352796<br>(14.92%) | 17979961<br>(17.19%) | 18924700<br>(16.43%) |
